# Supplementary figures and images for: AANAT1 functions in astrocytes to regulate sleep homeostasis
Source: eLife journal article supplement (doi:10.7554/elife.53994), 2020-09-21

Figure 1- figure supplement 1

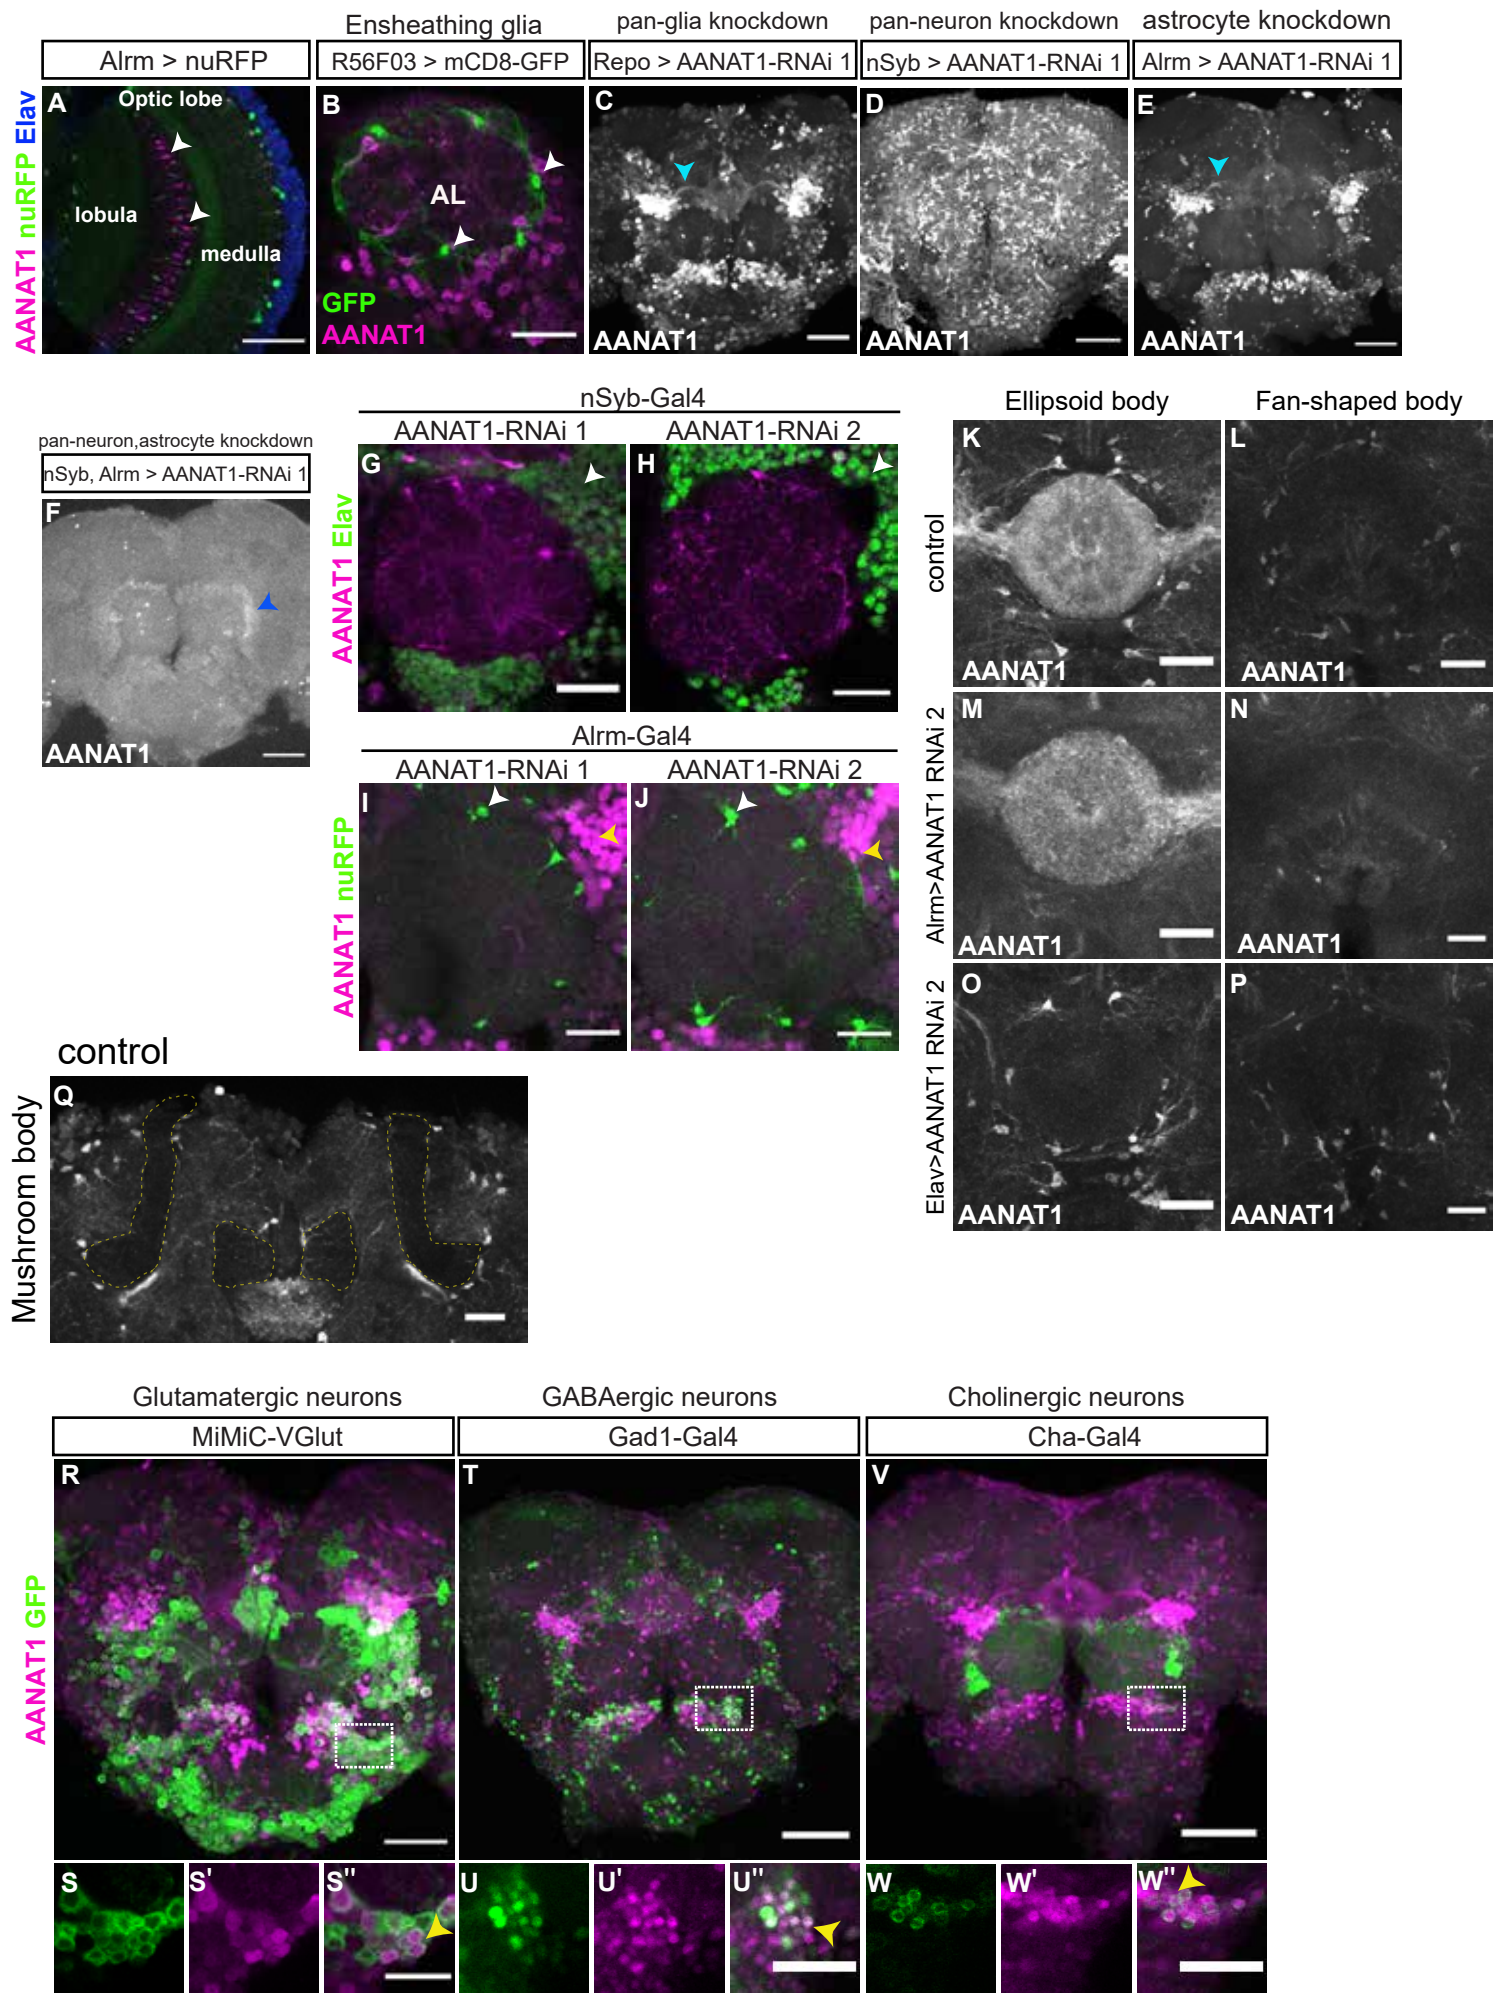

Supplement: supp [file elife_poa_e53994_Figure_1_figure_supplement_1.pdf › elife_poa_e53994_Figure_1_figure_supplement_1.pdf]

Figure 2- figure supplement 1

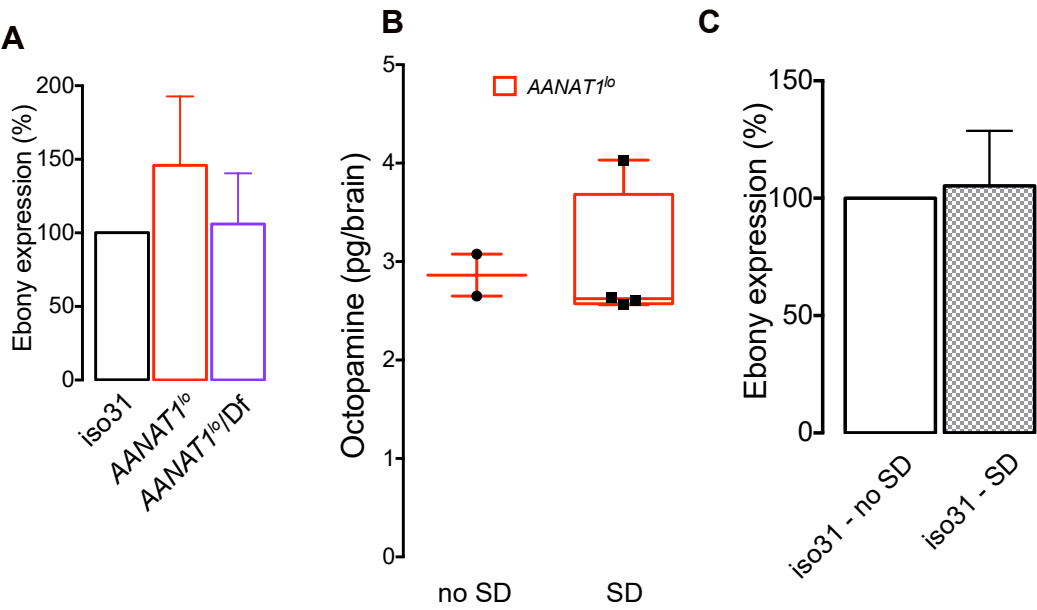

Supplement: supp [file elife_poa_e53994_Figure_2_figure_supplement_1.pdf › elife_poa_e53994_Figure_2_figure_supplement_1.pdf]

Figure 3 - figure supplement 1

Gal4 control   Gal4>UAS   UAS control

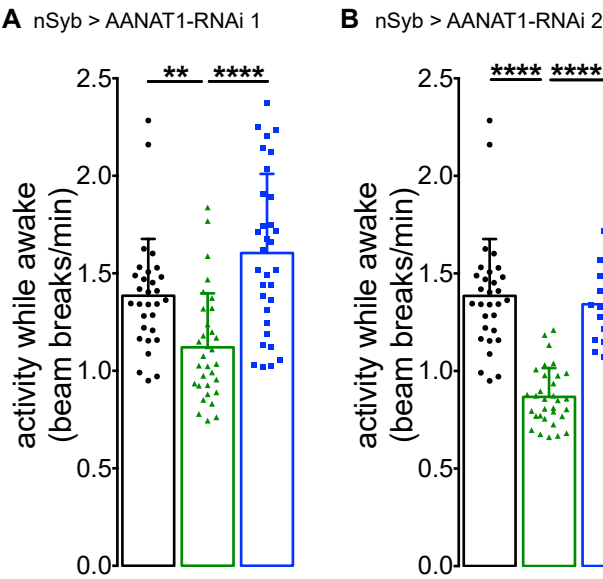

Supplement: supp [file elife_poa_e53994_Figure_3_figure_supplement_1.pdf › elife_poa_e53994_Figure_3_figure_supplement_1.pdf]

Figure 4 - figure supplement 1

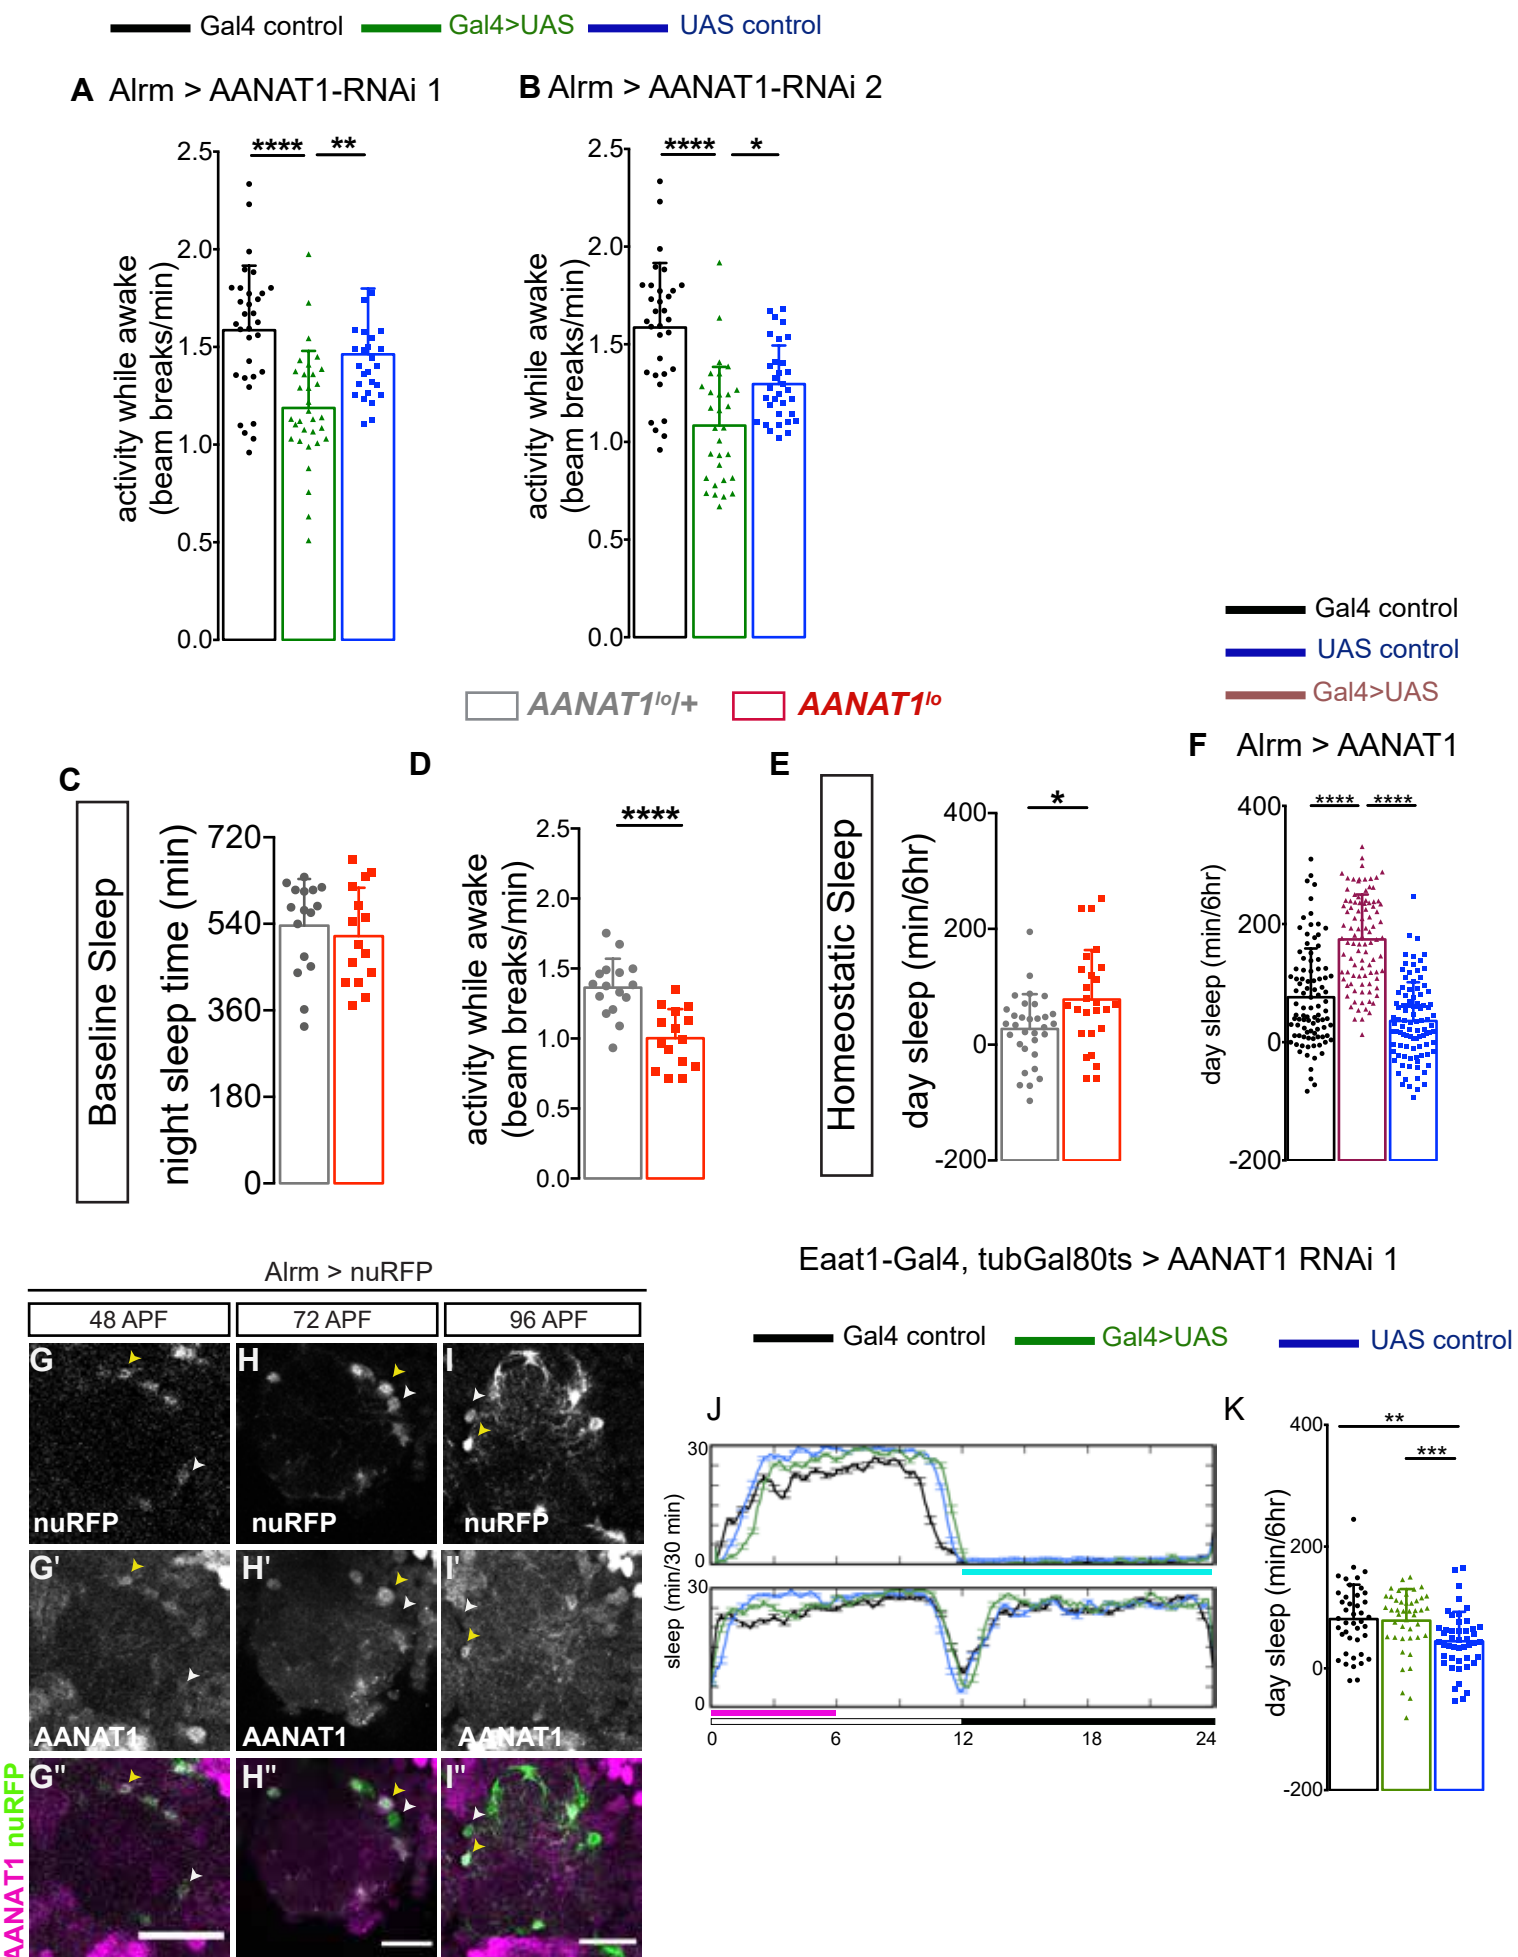

Supplement: supp [file elife_poa_e53994_Figure_4_figure_supplement_1.pdf › elife_poa_e53994_Figure_4_figure_supplement_1.pdf]
